# Supplementary material for: Stillbirths in urban Guinea-Bissau: A hospital- and community-based study
Source: PubMed Central journal article supplement (PMC5965864; doi:10.1371/journal.pone.0197680), 2018-05-23

**Supplementary Figure 1: Bissau map.** The suburbs in the BHP area (community cohort) are in grey. The HNSM hospital in the city center is in red.

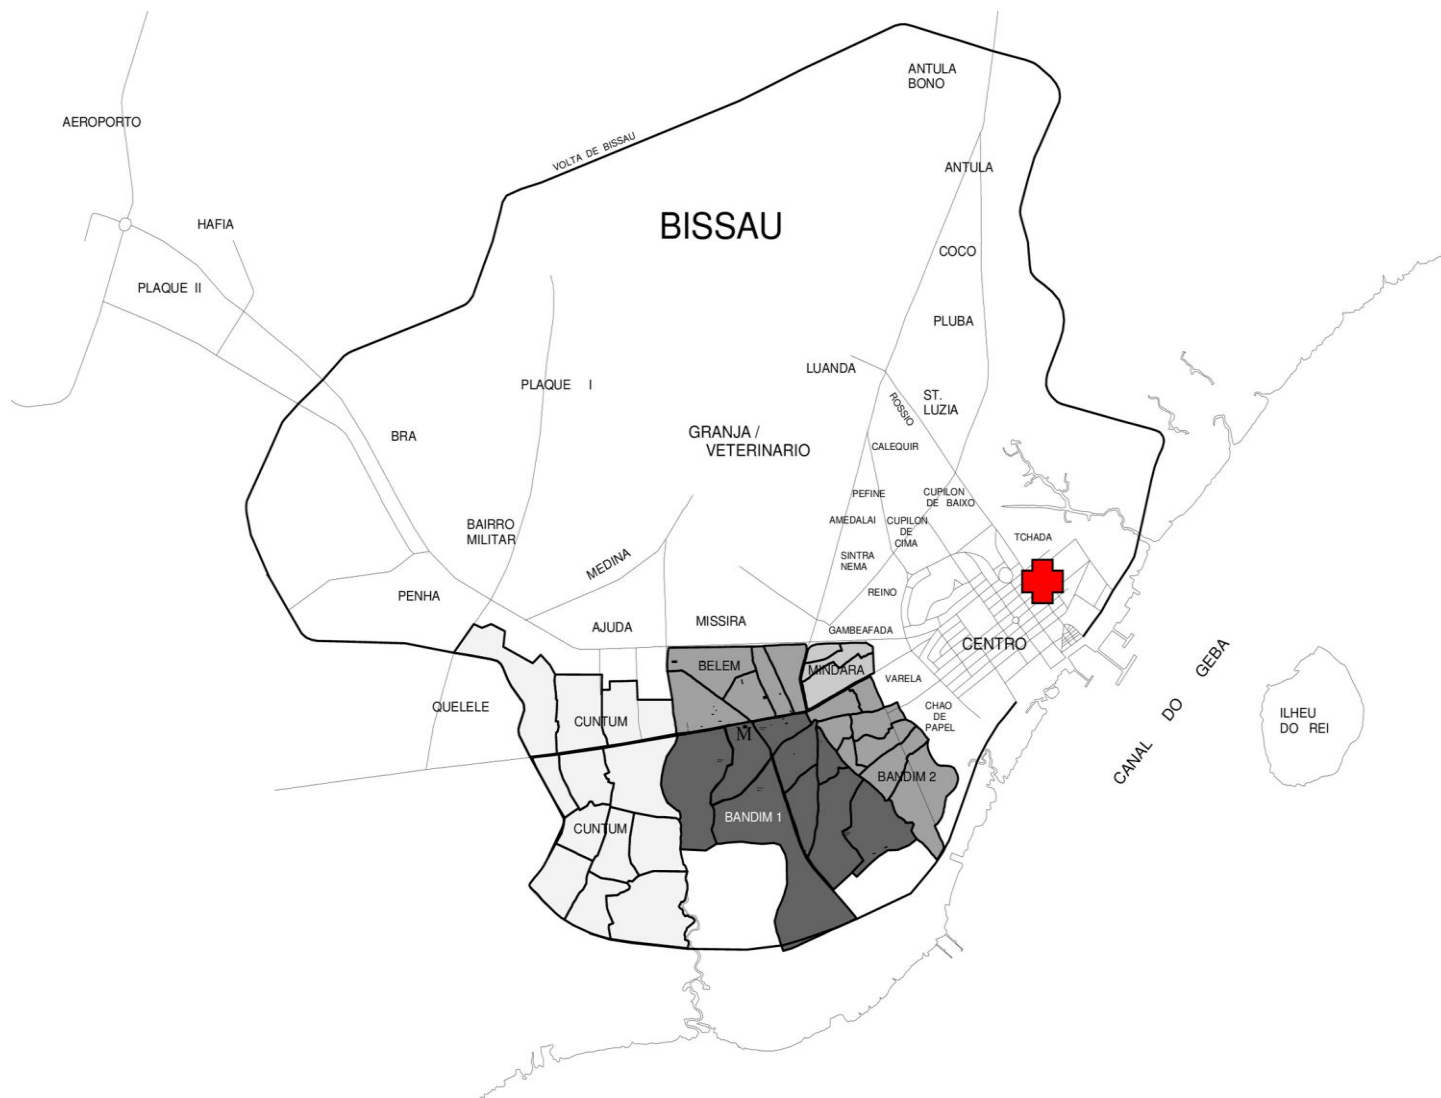

Supplement: pone.0197680.s001.pdf [file pone.0197680.s001.pdf]
