# Supplementary material for: Stillbirths in urban Guinea-Bissau: A hospital- and community-based study
Source: PubMed Central journal article supplement (PMC5965864; doi:10.1371/journal.pone.0197680), 2018-05-23

**Supplementary Figure 2: Stillbirth rate in the community cohort (BHP area) by number of ANC visits attended at local health centres.**

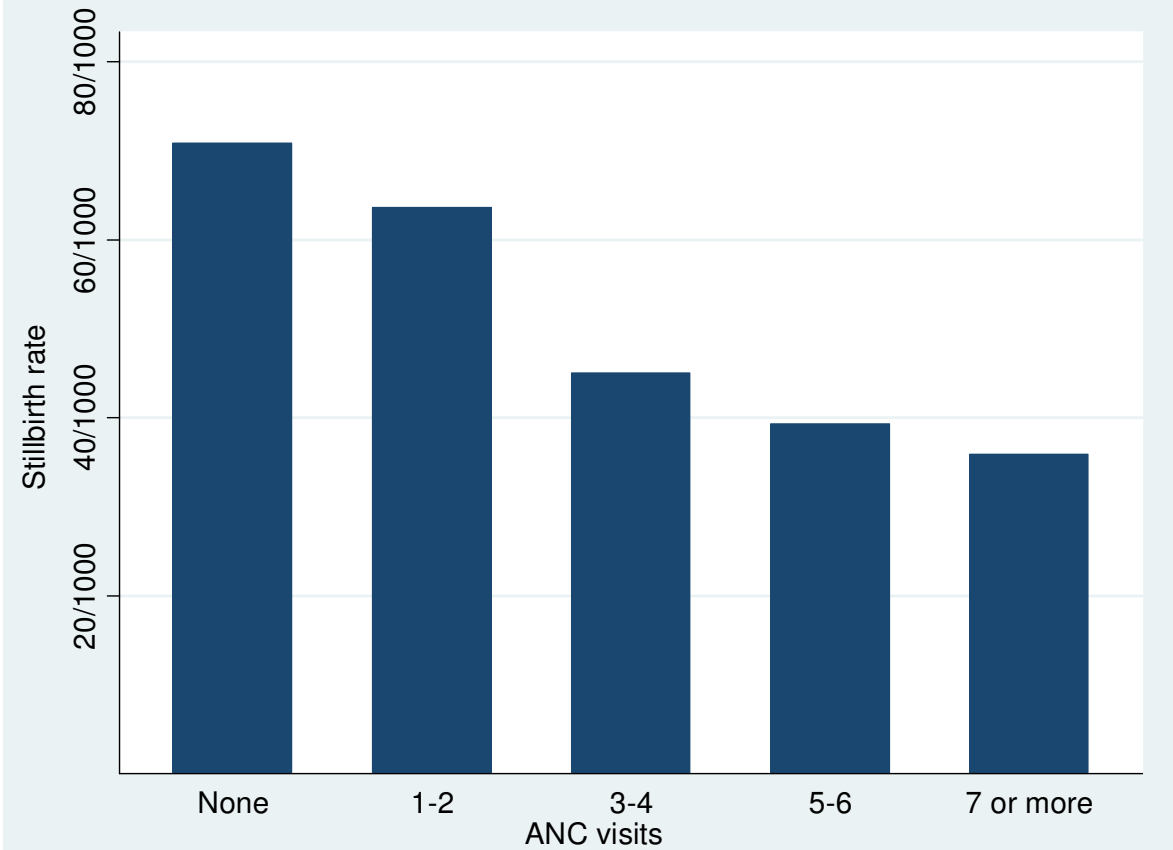

Supplement: pone.0197680.s002.pdf [file pone.0197680.s002.pdf]
