# Supplementary material for: Stillbirths in urban Guinea-Bissau: A hospital- and community-based study
Source: PubMed Central journal article supplement (PMC5965864; doi:10.1371/journal.pone.0197680), 2018-05-23
Supplement: pone.0197680.s003.pdf [file pone.0197680.s003.pdf]

**Supplementary Figure 3: FSB rate by time of delivery (24-hour clock) at the hospital. Women from outside Bissau city excluded.**

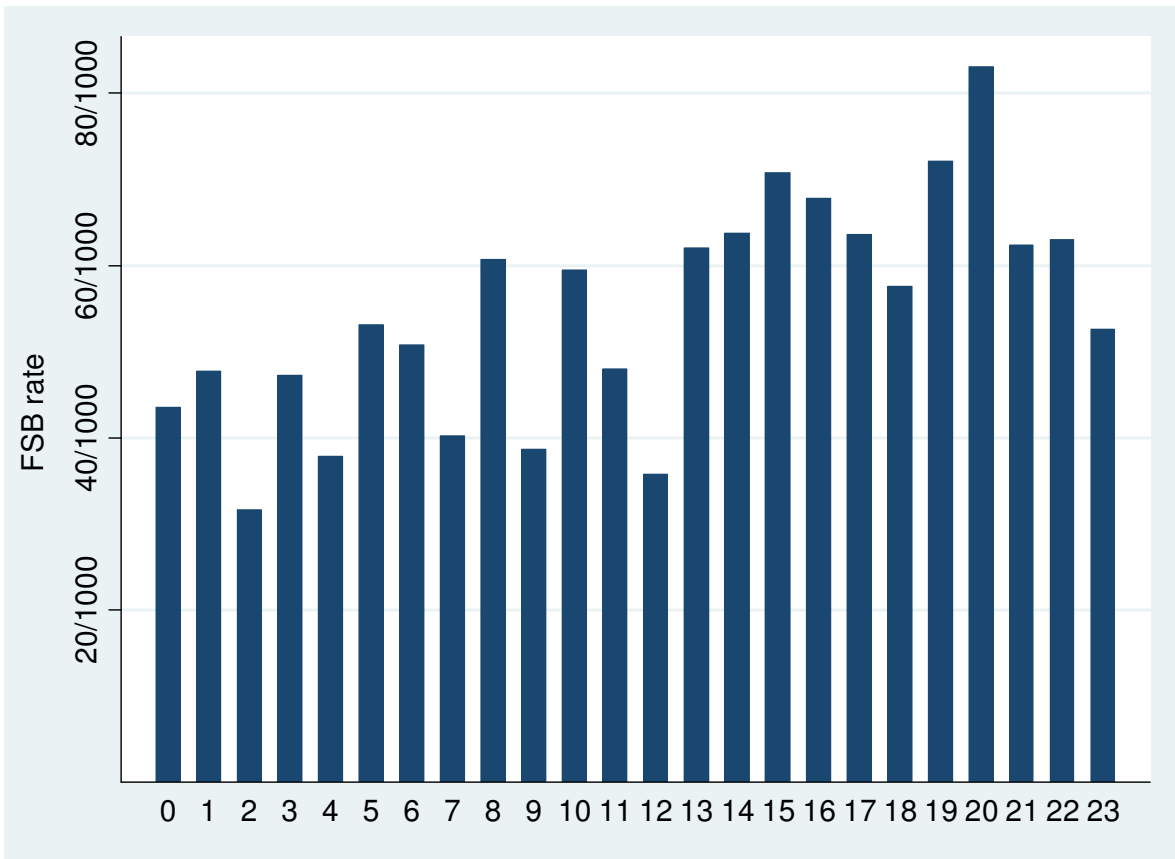

Note: As an example, 2H is 2 a.m. while 20H is 8 p.m.
