# Supplementary material for: Stillbirths in urban Guinea-Bissau: A hospital- and community-based study
Source: PubMed Central journal article supplement (PMC5965864; doi:10.1371/journal.pone.0197680), 2018-05-23
Supplement: pone.0197680.s004.pdf [file pone.0197680.s004.pdf]

**Supplementary Table 1: Characteristics of women from rest of Bissau vs. BHP area giving birth at the HNSM hospital**

|                      | <b>Other Bissau</b><br>N=27767 | <b>BHP area</b><br>N=6723 | <b>P or PR (95% CI)</b> |
|----------------------|--------------------------------|---------------------------|-------------------------|
| Age; years [N=34291] | 24.5 (5.80)                    | 24.9 (5.82)               | <0.001                  |
| Ethnicity; %         |                                |                           |                         |
| Balanta              | 24.6 (6843/27767)              | 8.9 (600/6723)            | 2.78 (2.54-3.00)        |
| Fula                 | 22.8 (6326/27767)              | 22.2 (1493/6723)          | 1.03 (0.97-1.09)        |
| Pepel                | 11.0 (3055/27767)              | 23.2 (1560/6723)          | 0.47 (0.45-0.50)        |
| Mandinga             | 11.5 (3205/27767)              | 7.6 (508/6723)            | 1.53 (1.39-1.68)        |
| Manjaco              | 6.9 (1914/27767)               | 12.4 (830/6723)           | 0.56 (0.51-0.61)        |
| Mancanha             | 7.5 (2090/27767)               | 10.0 (674/6723)           | 0.75 (0.69-0.82)        |
| Other                | 15.6 (4334/27767)              | 15.7 (1058/6723)          | 0.99 (0.93-1.06)        |
| Parity [N=33945]*    | 2 (1-3)                        | 2 (1-3)                   | 0.35                    |
| Married; %           | 72.0 (19752/27417)             | 69.6 (4637/6663)          | 1.04 (1.00-1.07)        |
| Educational level; % |                                |                           |                         |
| No schooling         | 23.5 (6019/25572)              | 20.5 (1282/6269)          | 1.15 (1.08-1.22)        |
| 1-4 years            | 17.6 (4503/25572)              | 15.2 (953/6269)           | 1.16 (1.08-1.24)        |
| ≥5 years             | 58.9 (15050/25572)             | 64.3 (4034/6269)          | 0.91 (0.88-0.95)        |
| HIV infection; %     | 5.6 (1004/18072)               | 4.2 (170/4037)            | 1.32 (1.12-1.55)        |

Cells are percent (n/N) or mean (SD), except for continuous non-normally distributed data (marked with \*) which are presented as median (25%-75% percentiles). For continuous data, we have added the total number [N] of observations.
